# Supplementary material for: The Impact of Dietary Energy Intake Early in Life on the Colonic Microbiota of Adult Mice
Source: PubMed Central journal article supplement (PMC4705468; doi:10.1038/srep19083), 2016-01-08
Supplement: srep19083-s1.pdf [file srep19083-s1.pdf]

# **The Impact of Dietary Energy Intake Early in Life on the Colonic Microbiota of Adult Mice**

**Jinyu Xu<sup>1,2</sup>, Jeffrey D. Galley<sup>3</sup>, Michael T. Bailey<sup>3,4,5,6</sup>, Jennifer M. Thomas-Ahner<sup>4</sup>, Steven K. Clinton<sup>4,7</sup>, and Susan E. Olivo-Marston<sup>2,4,\*</sup>**

<sup>1</sup> The Ohio State University Ph.D. Program in Nutrition, The Ohio State University, Columbus, OH 43210, USA

<sup>2</sup> Division of Epidemiology, College of Public Health, The Ohio State University, Columbus, OH 43210, USA

<sup>3</sup> Division of Biosciences, College of Dentistry, The Ohio State University, Columbus, OH 43210, USA

<sup>4</sup> Comprehensive Cancer Center, The Ohio State University, Columbus, OH 43210, USA

<sup>5</sup> Institute for Behavioral Medicine Research, The Ohio State University Wexner Medical Center, Columbus, OH 43210, USA

<sup>6</sup> Center for Microbial Pathogenesis, The Research Institute at Nationwide Children's Hospital, Columbus OH 43205, USA

<sup>7</sup> Division of Medical Oncology, Department of Internal Medicine, The Ohio State University, Columbus, OH 43210, USA

\* Author to whom correspondence should be addressed. [olivo-marston.1@osu.edu](mailto:olivo-marston.1@osu.edu)

| Product                        | CON   |       | HF    |       | ER    |      |
|--------------------------------|-------|-------|-------|-------|-------|------|
|                                | gm    | kcal  | gm    | kcal  | gm    | kcal |
| Protein                        | 19.2% | 20%   | 23.7% | 20%   | 27.0% | 29%  |
| Carbohydrate                   | 67.3% | 70%   | 41.4% | 35%   | 54.0% | 57%  |
| Fat                            | 4.3%  | 10%   | 23.6% | 45%   | 6.0%  | 14%  |
| <i>Kcal/gm</i>                 | 3.85  |       | 4.73  |       | 3.78  |      |
| <b>Ingredient (per 1000 g)</b> |       |       |       |       |       |      |
| Casein, 80 Mesh                | 200   | 800   | 200   | 800   | 200   | 800  |
| L-Cystine                      | 3     | 12    | 3     | 12    | 3     | 12   |
| Corn Starch                    | 315   | 1 260 | 72.8  | 291   | 197.9 | 792  |
| Maltodextrin 10                | 35    | 140   | 100   | 400   | 0     | 0    |
| Sucrose                        | 350   | 1 400 | 172.8 | 691   | 197.9 | 792  |
| Cellulose, BW200               | 50    | 0     | 50    | 0     | 50    | 0    |
| Soybean Oil                    | 25    | 225   | 25    | 225   | 25    | 225  |
| Lard                           | 20    | 180   | 177.5 | 1 598 | 20    | 180  |
| Mineral Mix S10026             | 10    | 0     | 10    | 0     | 10    | 0    |
| DiCalcium Phosphate            | 13    | 0     | 13    | 0     | 13    | 0    |
| Calcium Carbonate              | 5.5   | 0     | 5.5   | 0     | 5.5   | 0    |
| Potassium Citrate, 1 H2O       | 16.5  | 0     | 16.5  | 0     | 16.5  | 0    |
| Vitamin Mix V10001             | 10    | 40    | 10    | 40    | 10    | 40   |
| Choline Bitartrate             | 2     | 0     | 2     | 0     | 2     | 0    |

**Supplementary Table 1. Diet composition and calorie distribution.** The formula<sup>1</sup> to calculate the exact amount of food for mice on ER diet in either phase was provided by the company (Research Diets, Inc. New Brunswick, NJ). To ensure 30% energy restriction is equal for all animals on ER in phase 2, reference animals were the CC (control-control) group.

<sup>1</sup> *The amount of ER diet for each animal/day = 0.71 × the average amount of CON diet consumed by the reference animals in the previous day.*

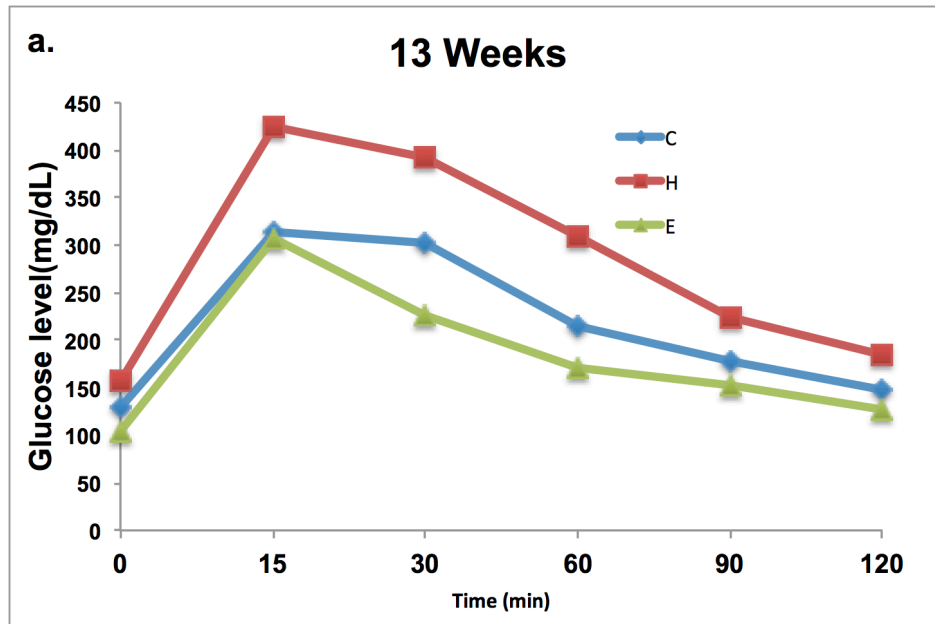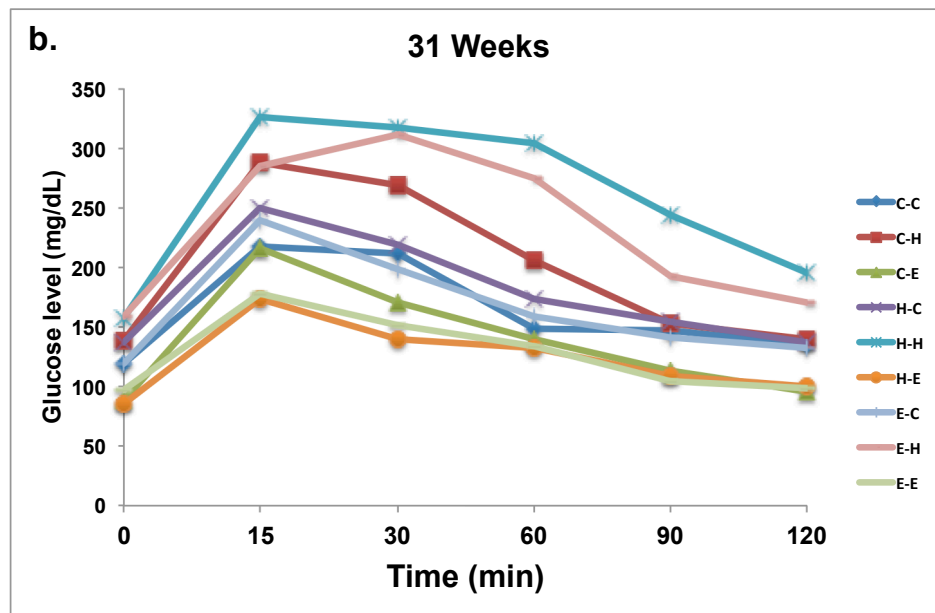

**Supplementary Figure 1.** Blood glucose levels during glucose tolerance testing. Response to glucose tolerance testing at 13 (a) and 31 (b) weeks of age are shown (n=10). Diet patterns are represented by letter codes C (10% kcal from fat, control diet), H (45% kcal from fat, high fat diet), and E (30% caloric restricted compare to control, caloric restricted diet). Each data point represents the mean blood glucose level per dietary group.

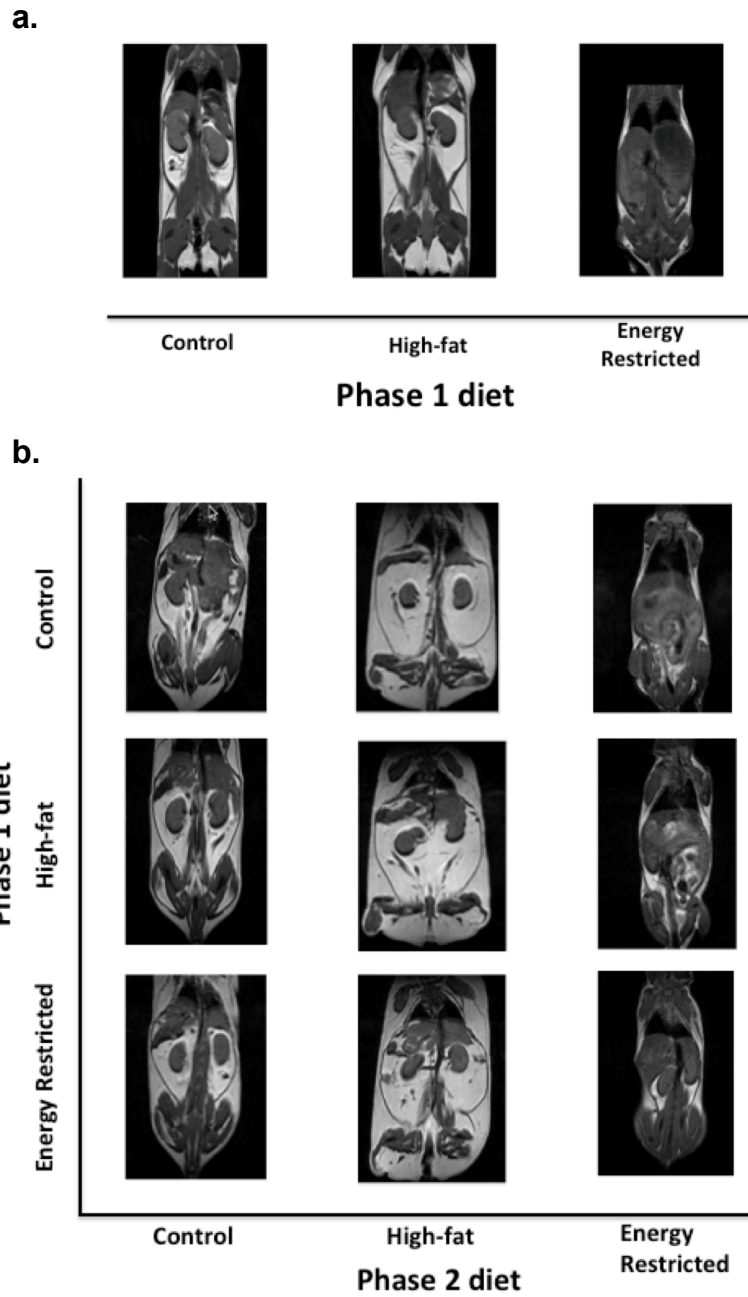

**Supplementary Figure 2.** Magnetic resonance imaging (MRI) showing body fat distribution. Body fat at 15 (a) and 60 (b) weeks of age are shown by MRI. Bright area indicates fat tissue.
